# Supplementary material
Source: Springer Nature journal article supplement (https://www.springermedizin.de/resource/supplementary/12913_2009_1235_MOESM1_ESM.pdf/9528468)
Supplement: MOESM1 [file 9528468]

# Chemotherapy

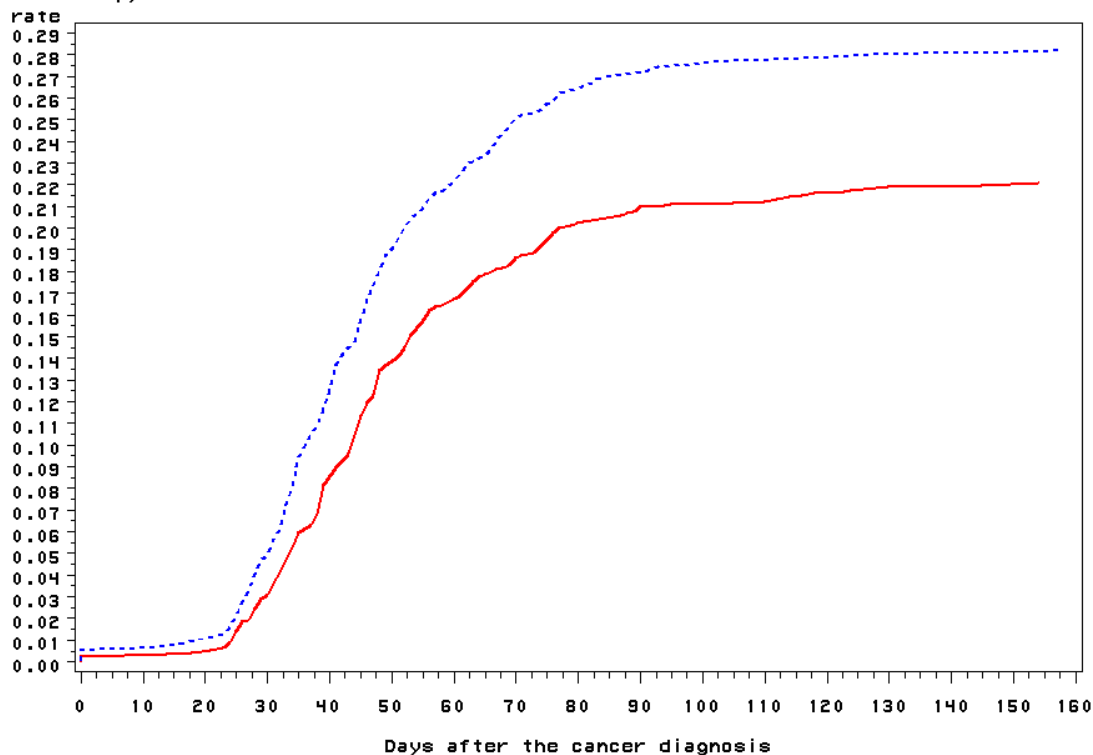

Mammography use before the cancer diagnosis

— No prior mammography use  
- - - Having prior mammography use
